# Supplementary material for: Increased Maternal Genome Dosage Bypasses the Requirement of the FIS Polycomb Repressive Complex 2 in Arabidopsis Seed Development
Source: PubMed Central journal article supplement (PMC3542072; doi:10.1371/journal.pgen.1003163), 2013-01-10

Figure S2

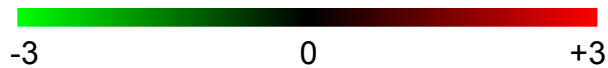

Up-regulated genes

Down-regulated genes

Embryo MPE PE CZE Seed coat  
1 2 3 4 5 1 2 3 5 1 2 3 4 5 1 2 3 4 5

Embryo MPE PE CZE Seed coat  
1 2 3 4 5 1 2 3 5 1 2 3 4 5 1 2 3 4 5

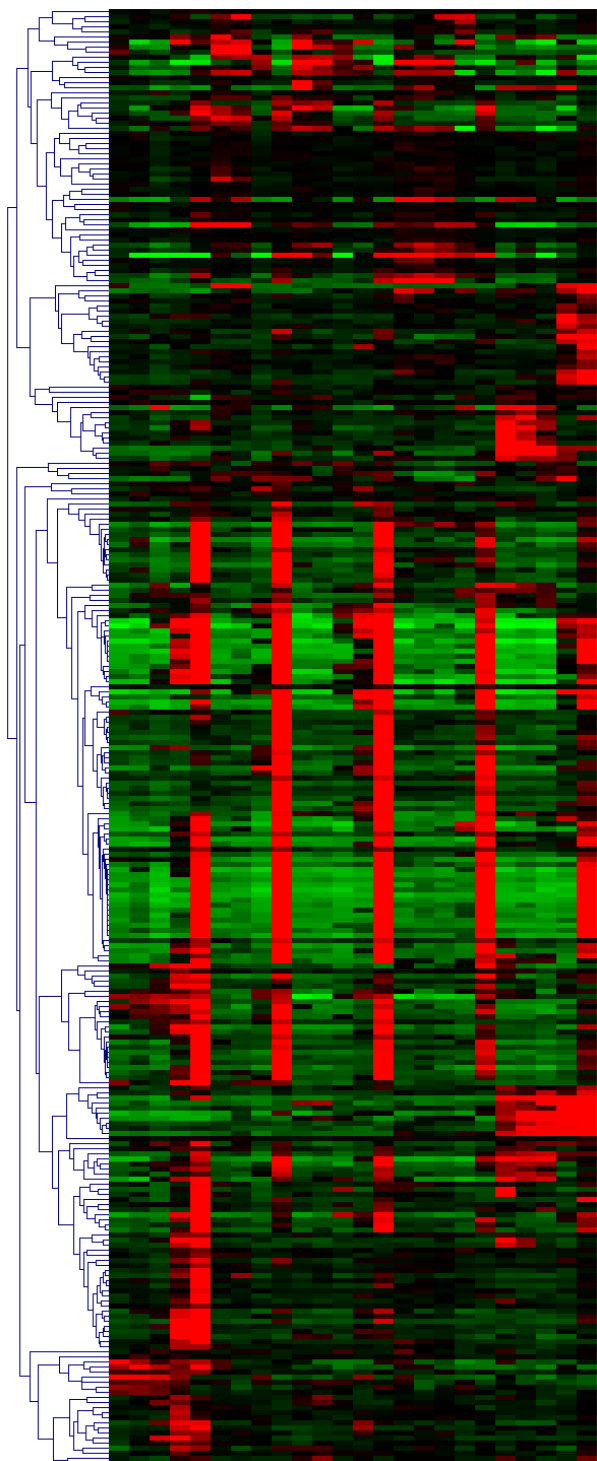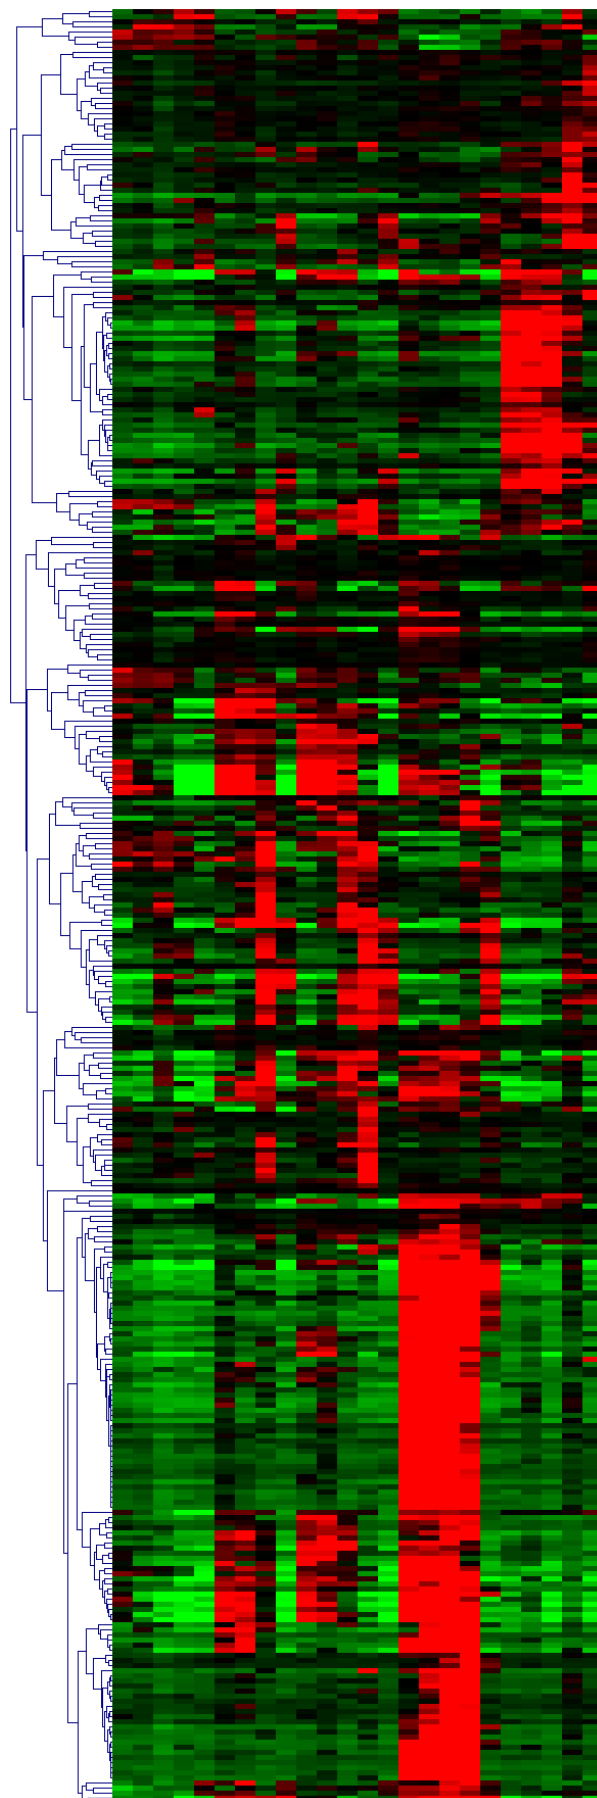

Supplement: pgen.1003163.s002.pdf [file pgen.1003163.s002.pdf]
