# Supplementary material for: Increased Maternal Genome Dosage Bypasses the Requirement of the FIS Polycomb Repressive Complex 2 in Arabidopsis Seed Development
Source: PubMed Central journal article supplement (PMC3542072; doi:10.1371/journal.pgen.1003163), 2013-01-10

Figure S4

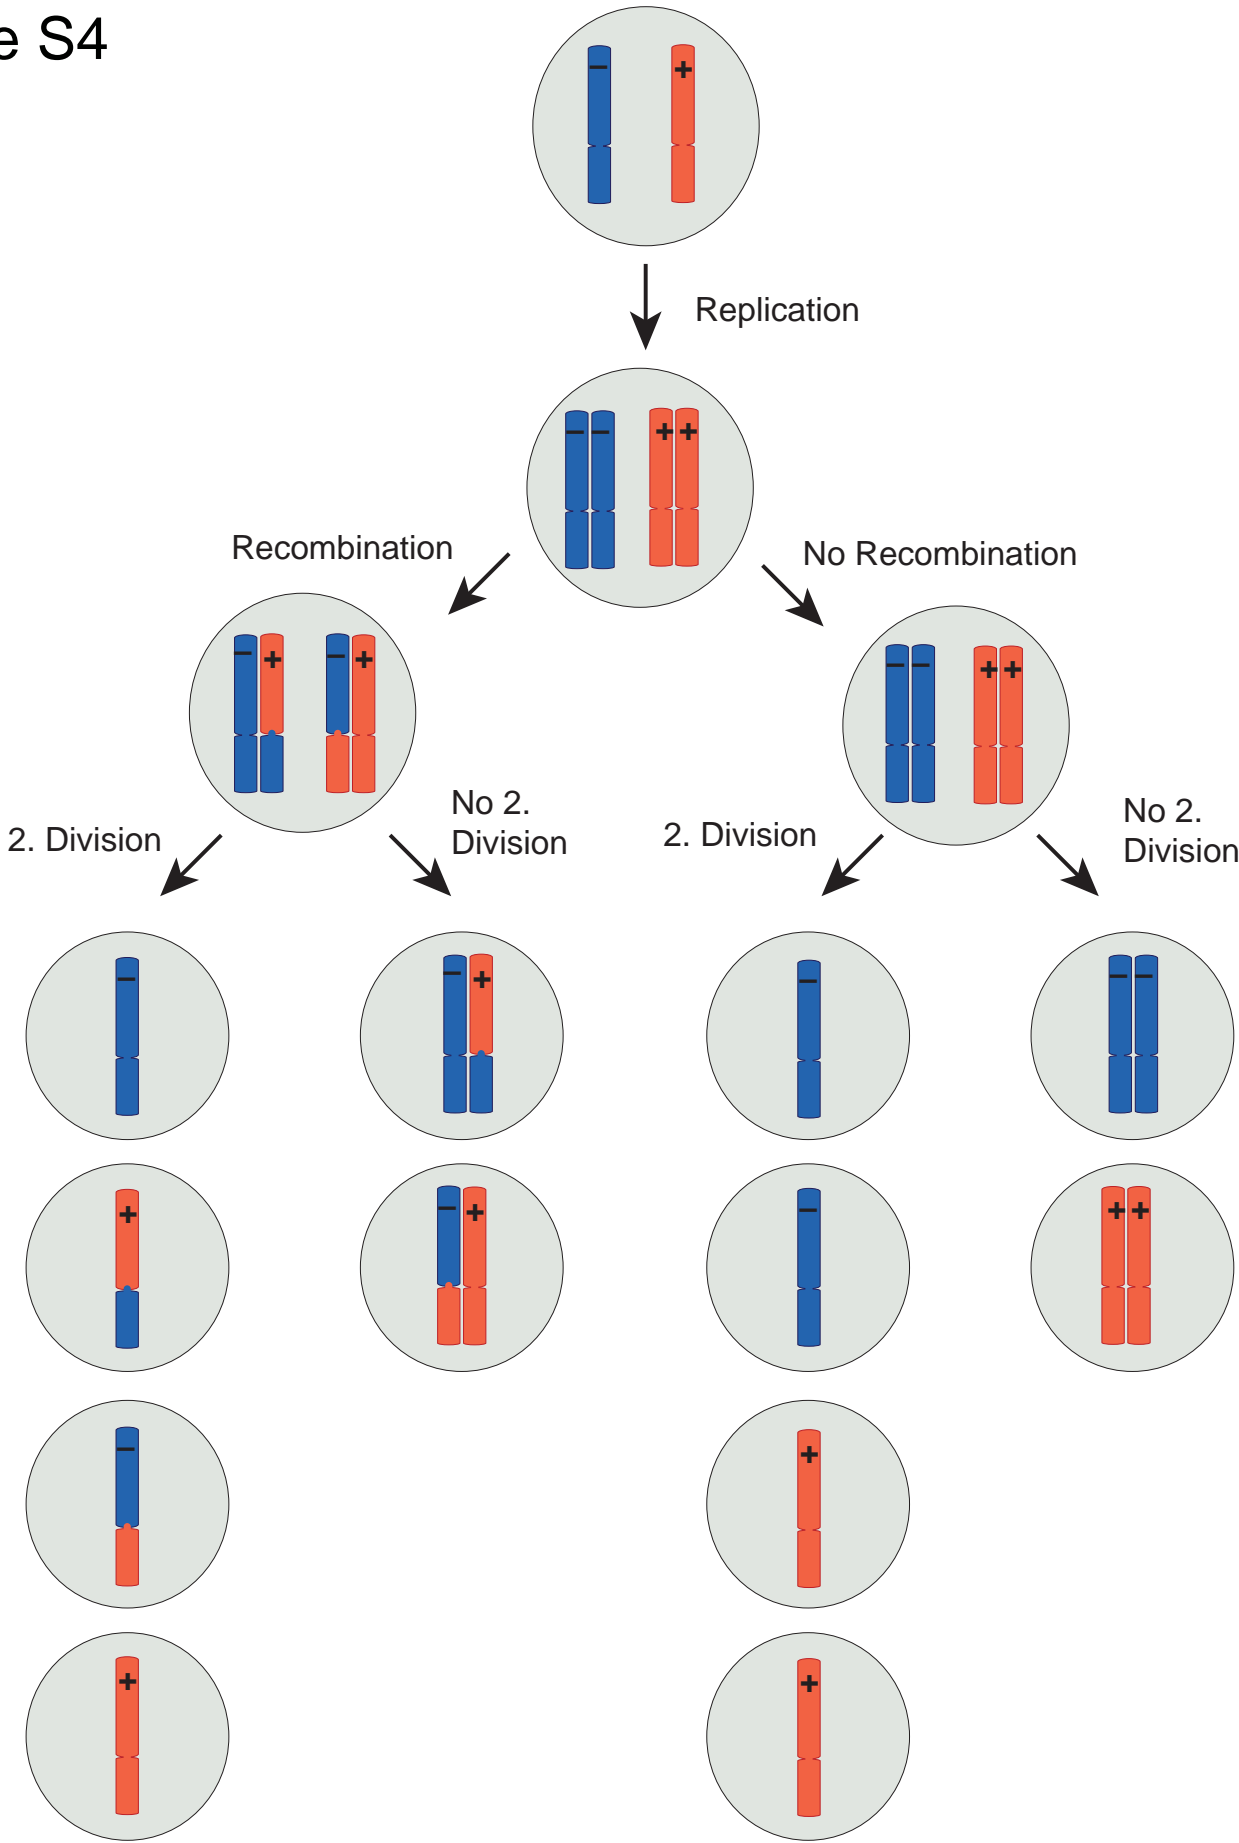

Supplement: pgen.1003163.s004.pdf [file pgen.1003163.s004.pdf]
